# Supplementary material for: WIP1 Contributes to the Adaptation of Fanconi Anemia Cells to DNA Damage as Determined by the Regulatory Network of the Fanconi Anemia and Checkpoint Recovery Pathways
Source: PubMed Central journal article supplement (PMC6509935; doi:10.3389/fgene.2019.00411), 2019-05-03

**Supplementary material S3. FANCD2I double null mutant simulations.** All the simulations presented in this section have inactivation of the node FANCD2I and additional inactivation of the node specified in every page. These simulations were run in presence of a single pulse of ICL or persistent presence of ICL.

# FAcore\_0\_per\_ICL

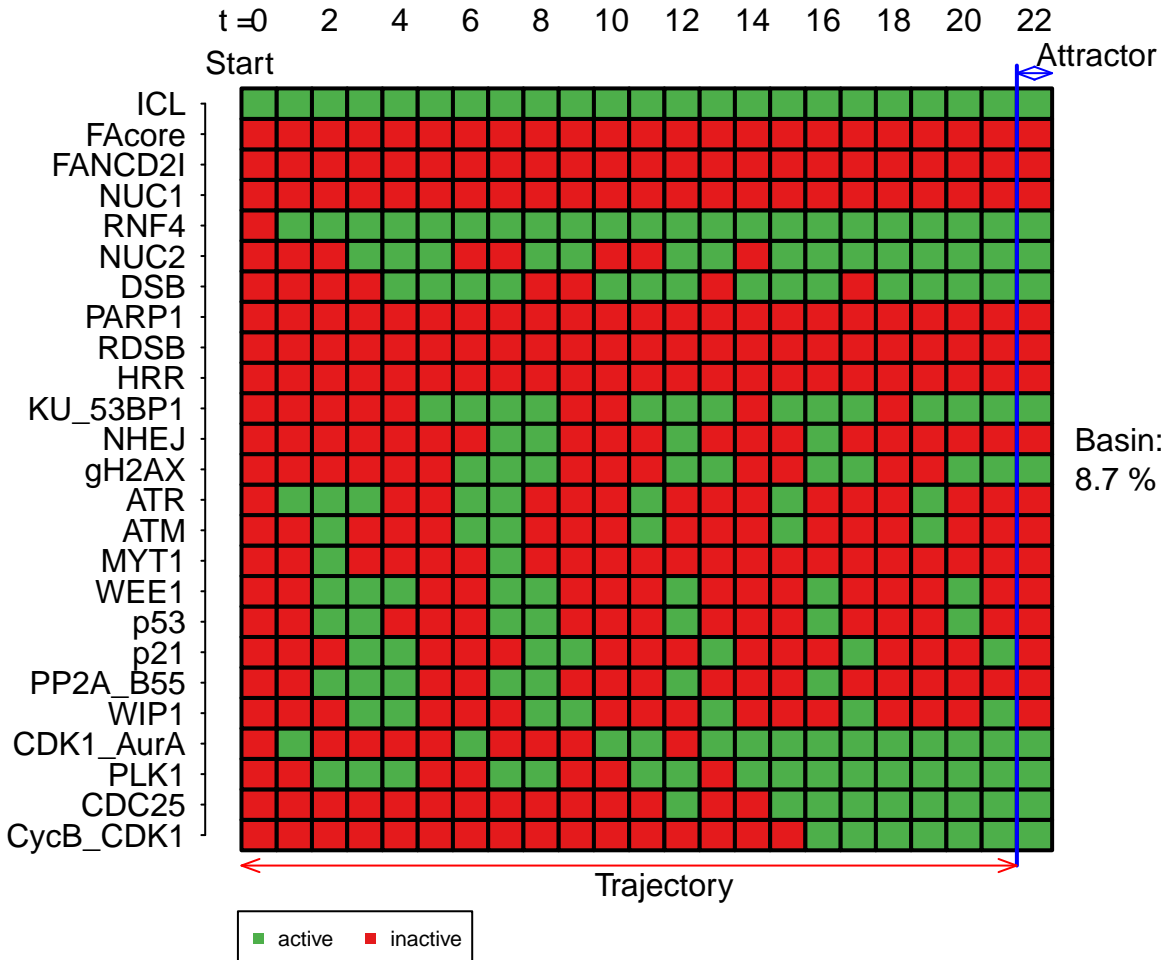

# FAcore\_0\_pul\_ICL

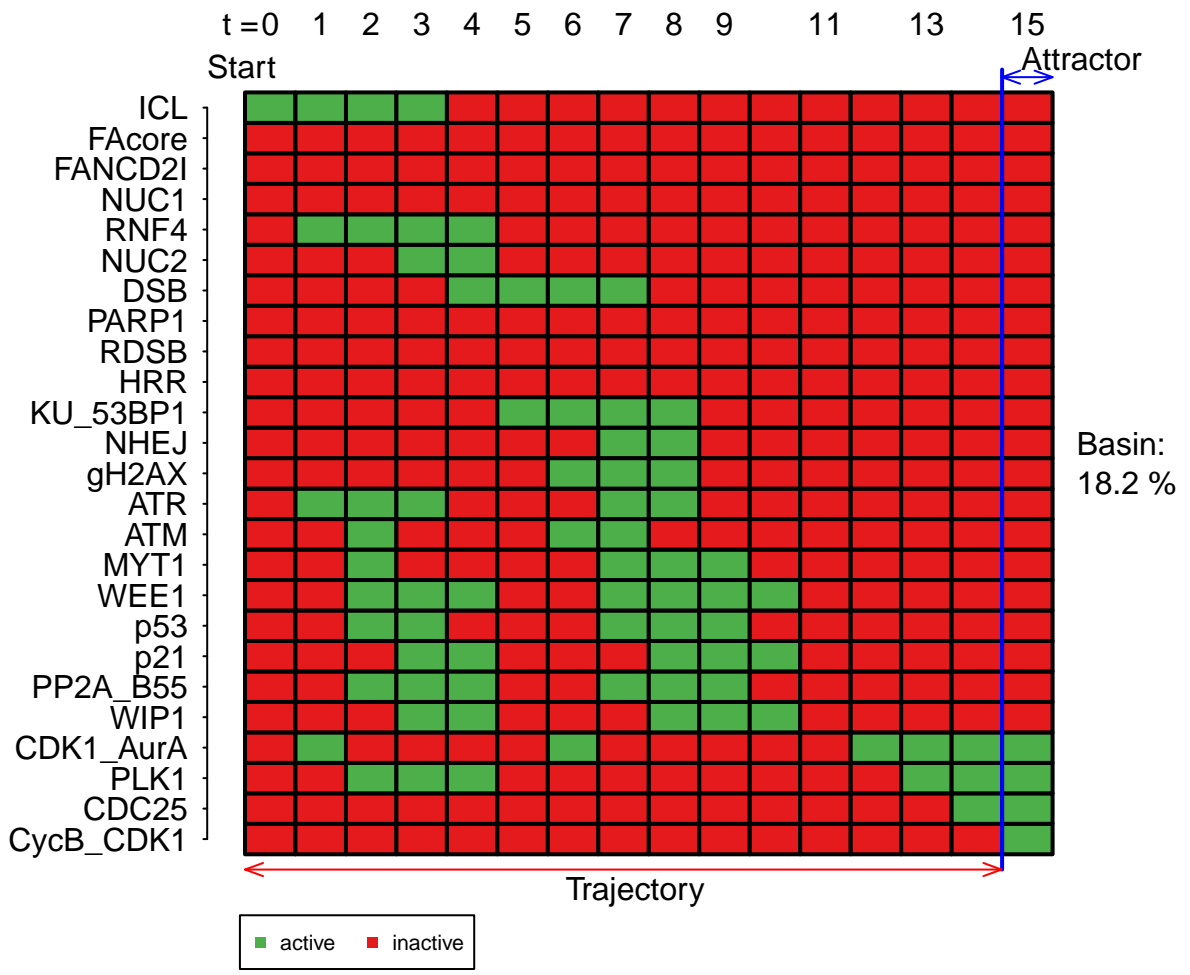





















# RDSB\_0\_pul\_ICL

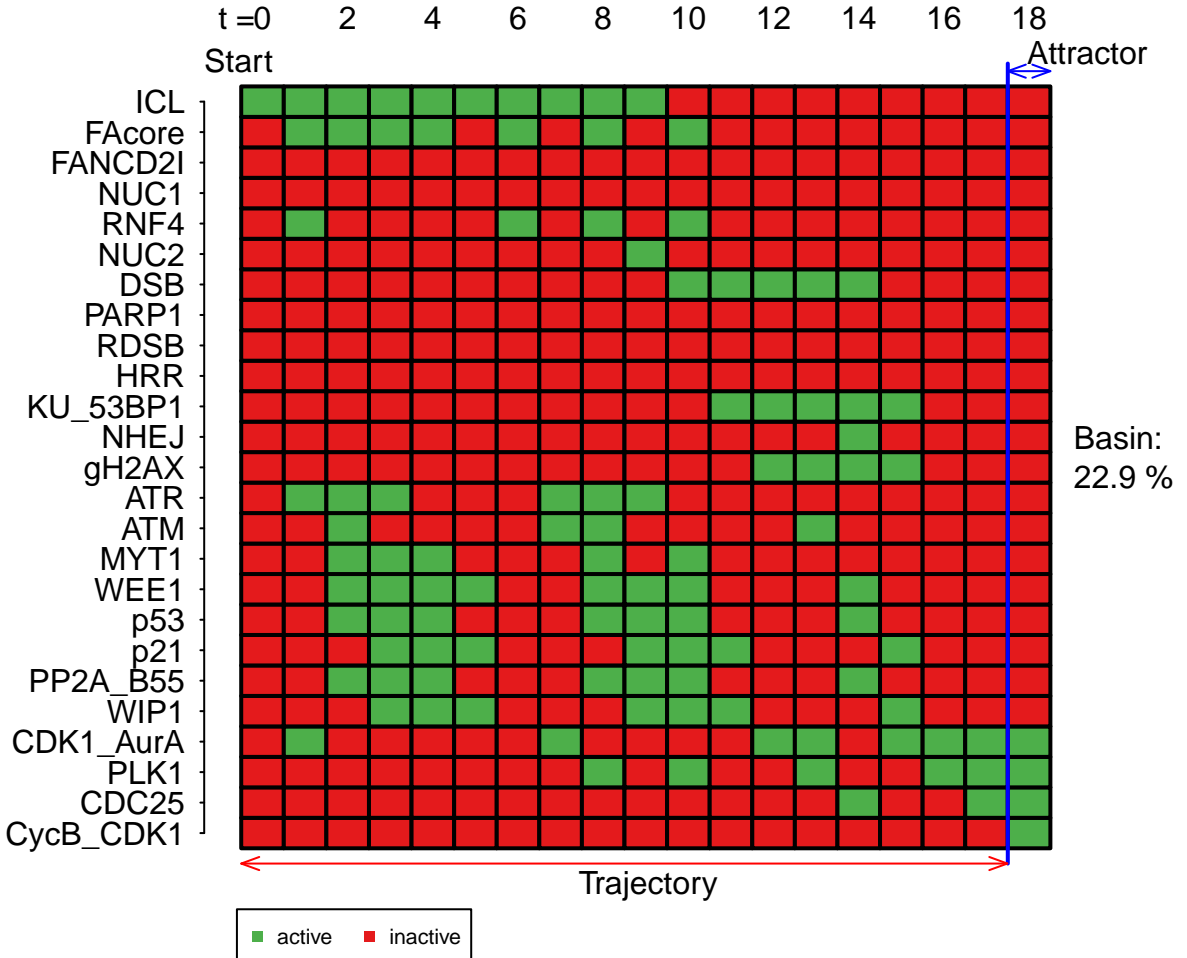















# gH2AX\_0\_per\_ICL

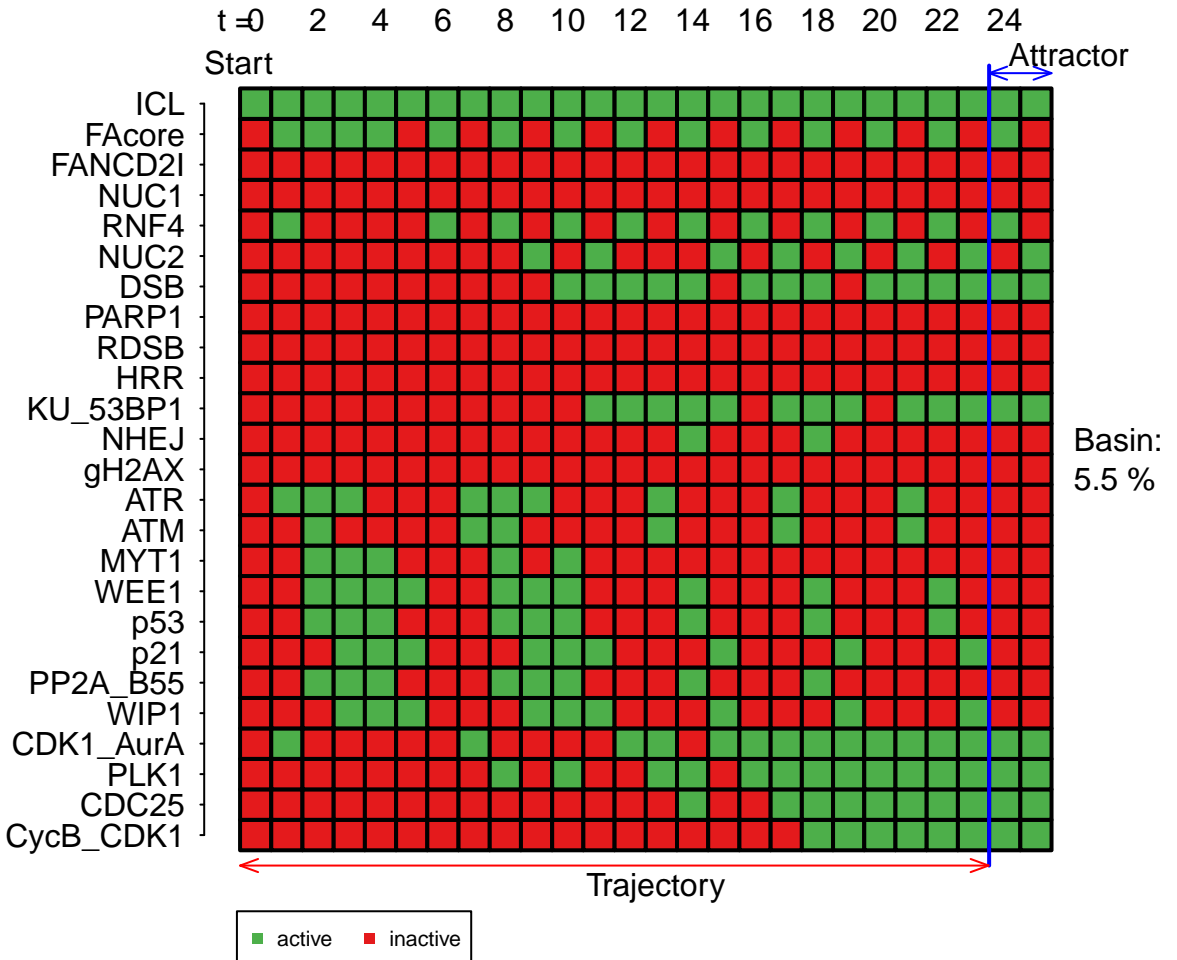



# ATR\_0\_per\_ICL

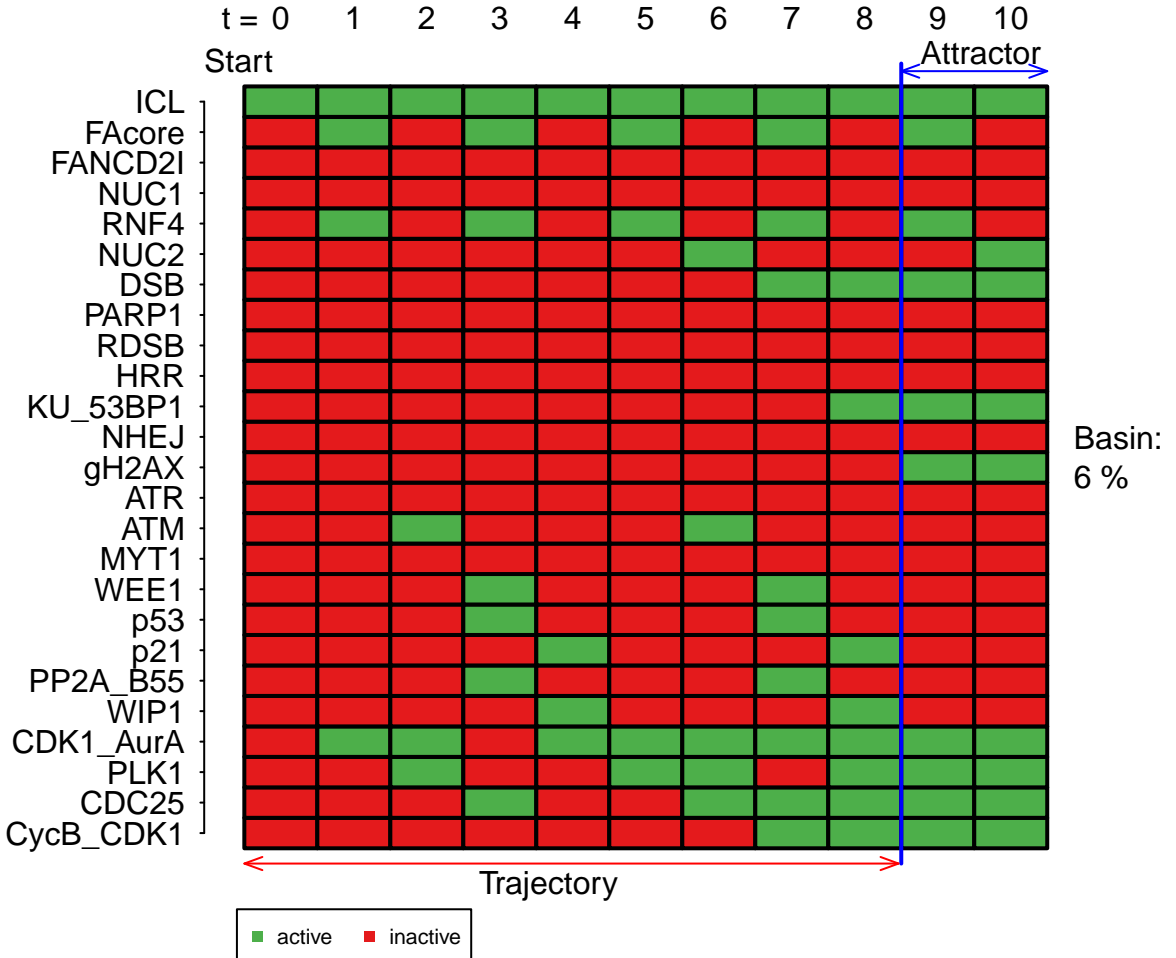

# ATR\_0\_pul\_ICL

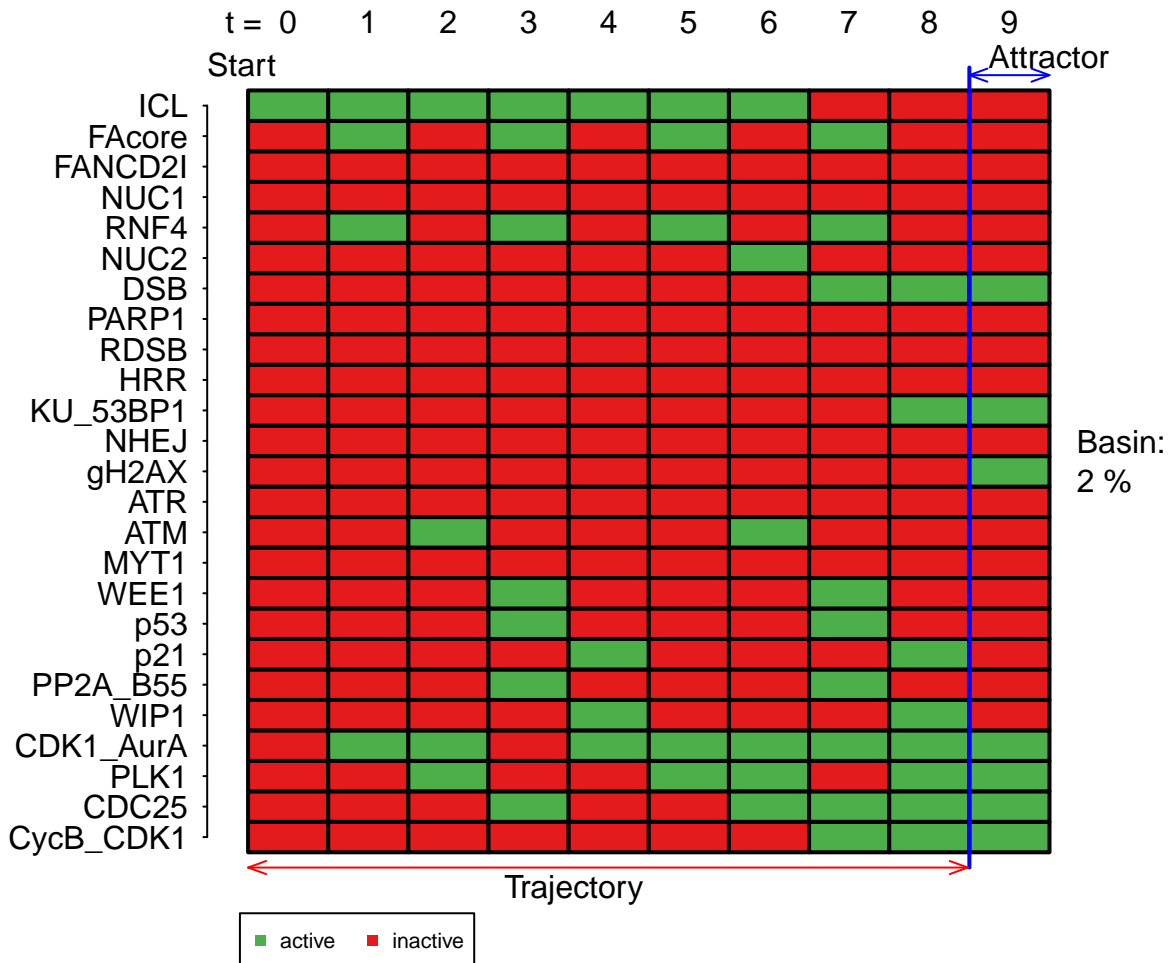









# MYT1\_0\_pul\_ICL

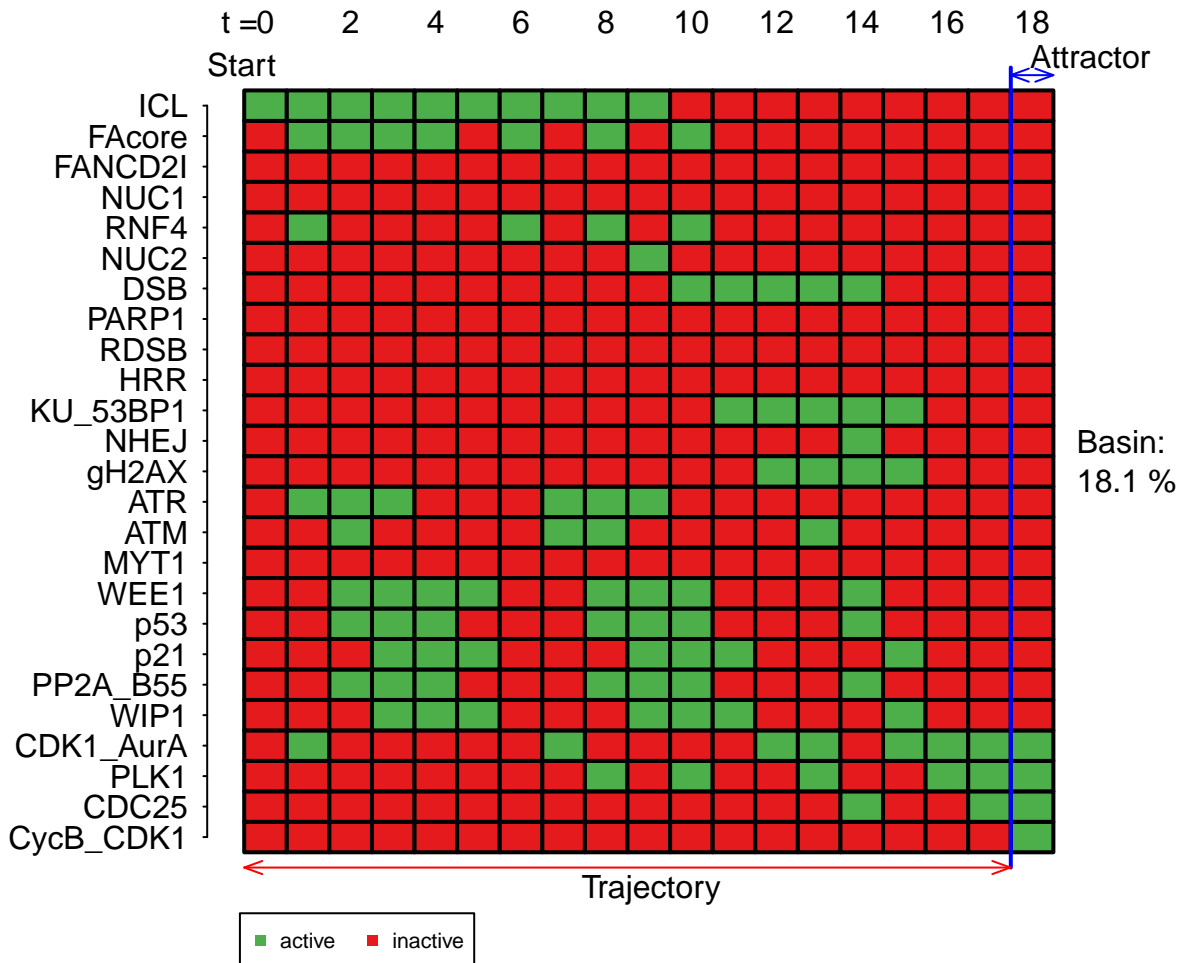

# WEE1\_0\_per\_ICL

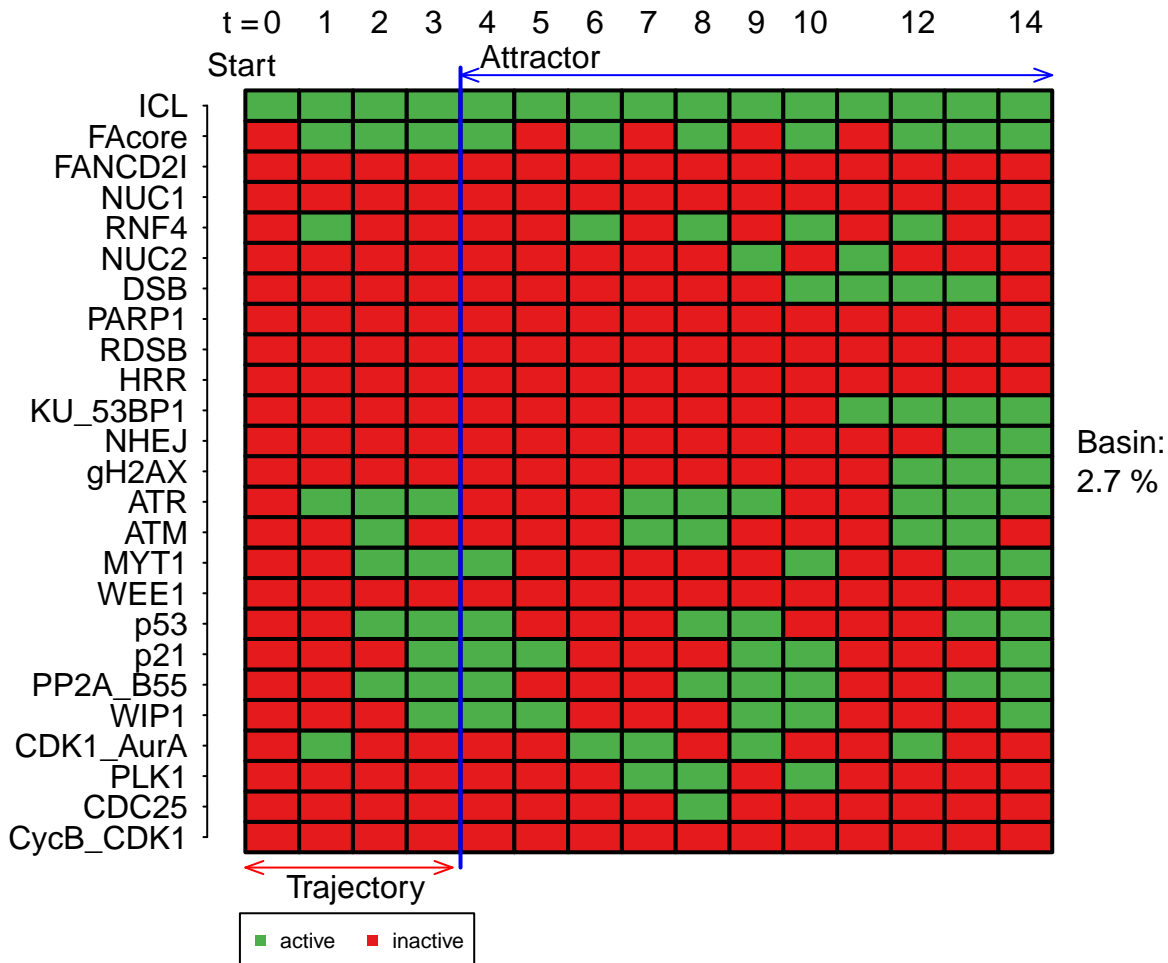

# WEE1\_0\_pul\_ICL

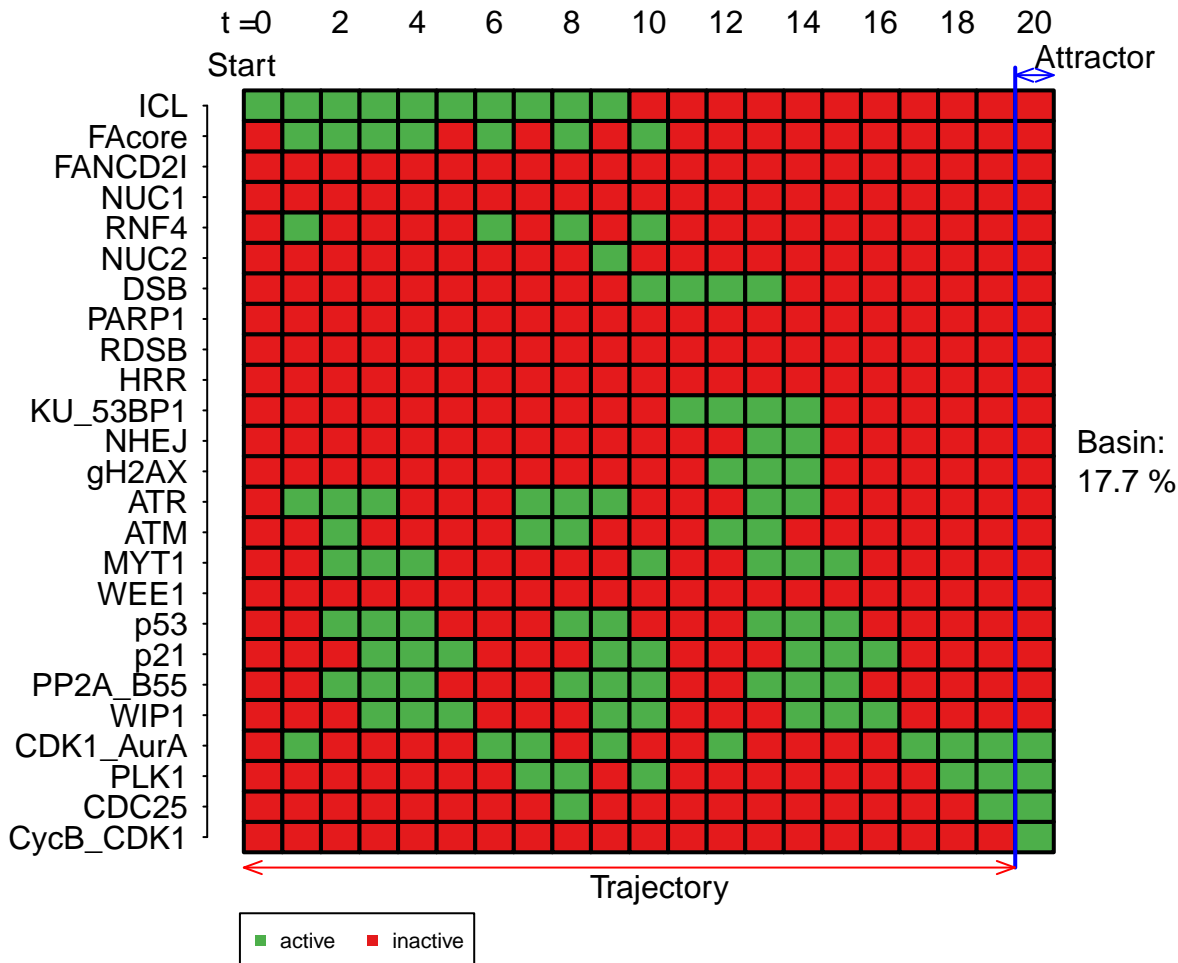

# p53\_0\_per\_ICL

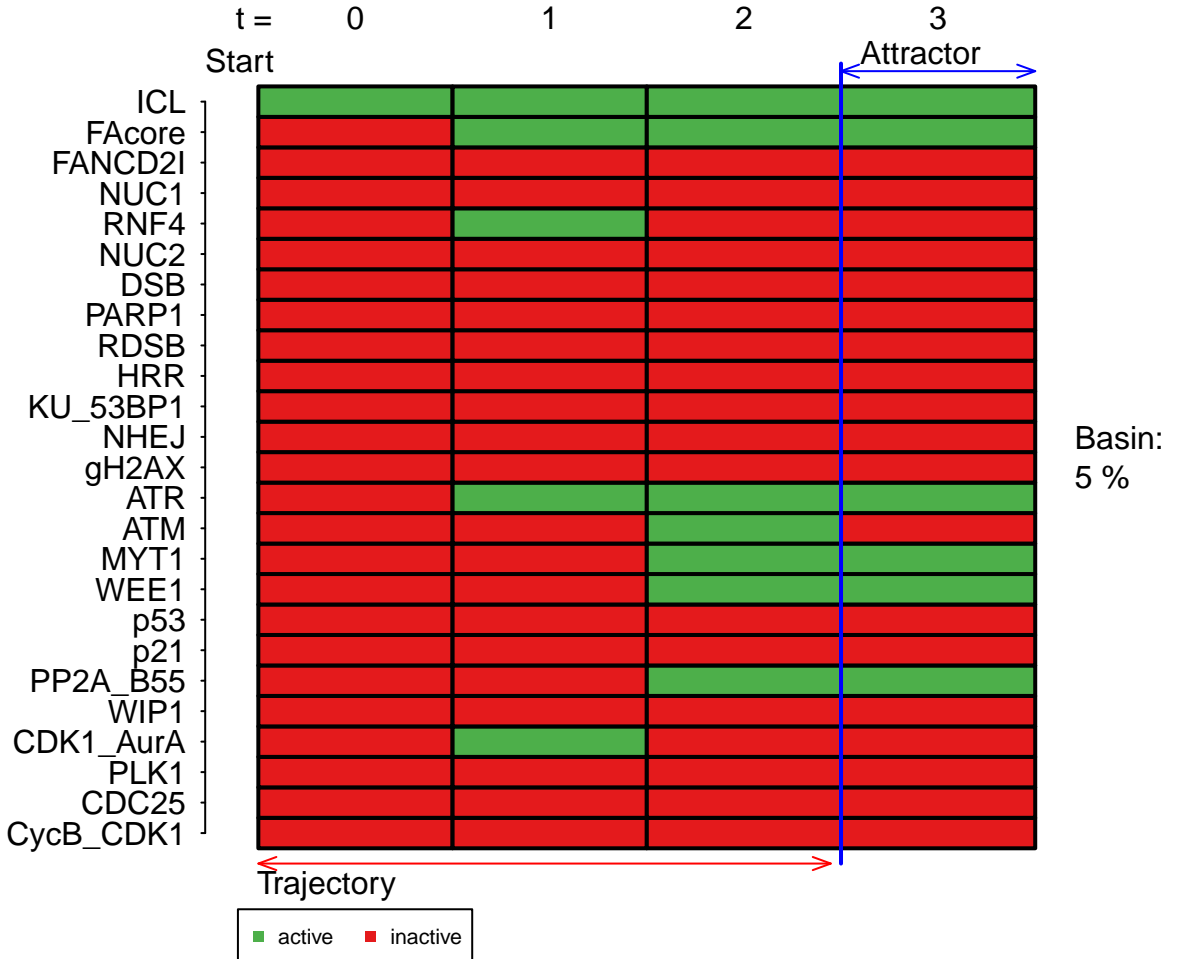

# p53\_0\_pul\_ICL

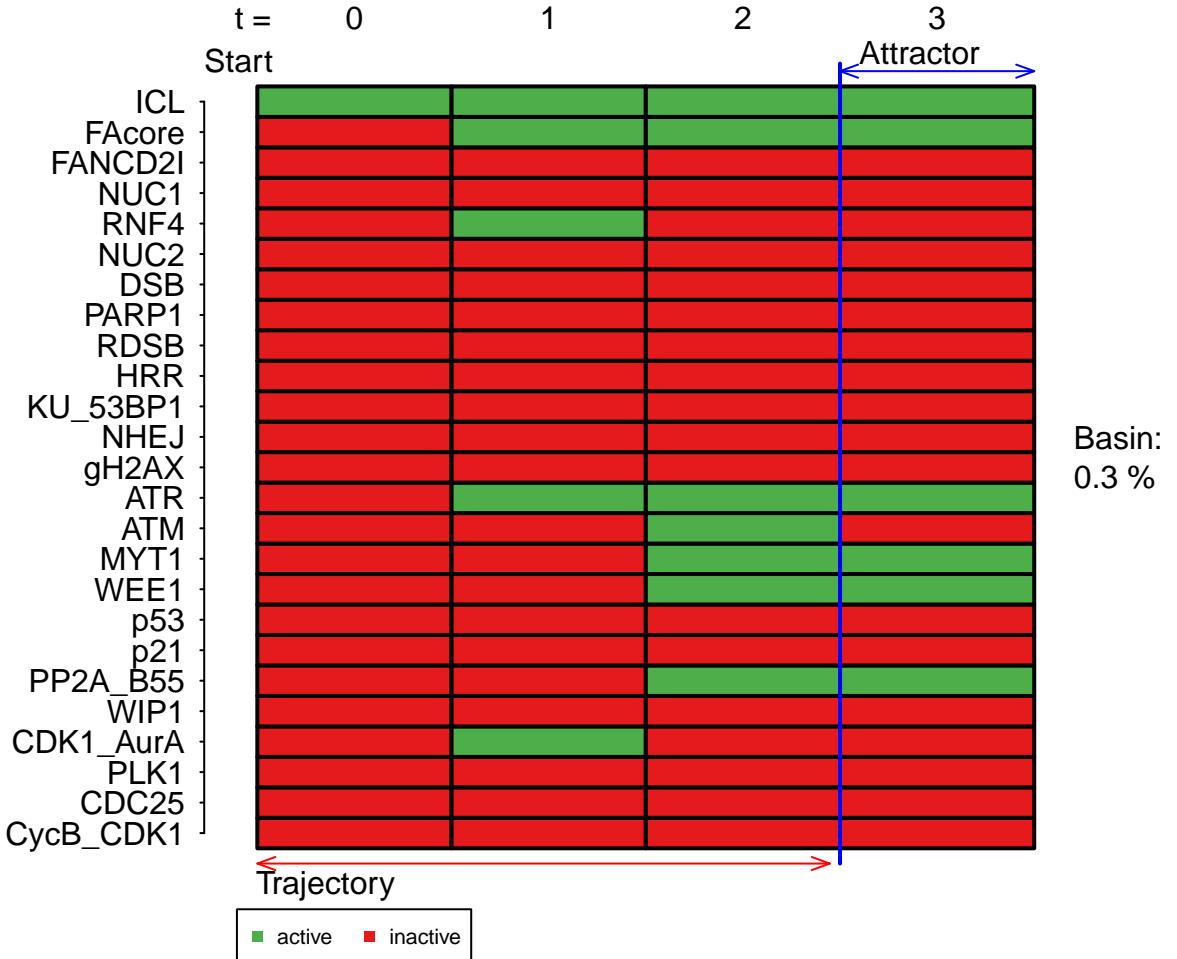





# p21\_0\_pul\_ICL

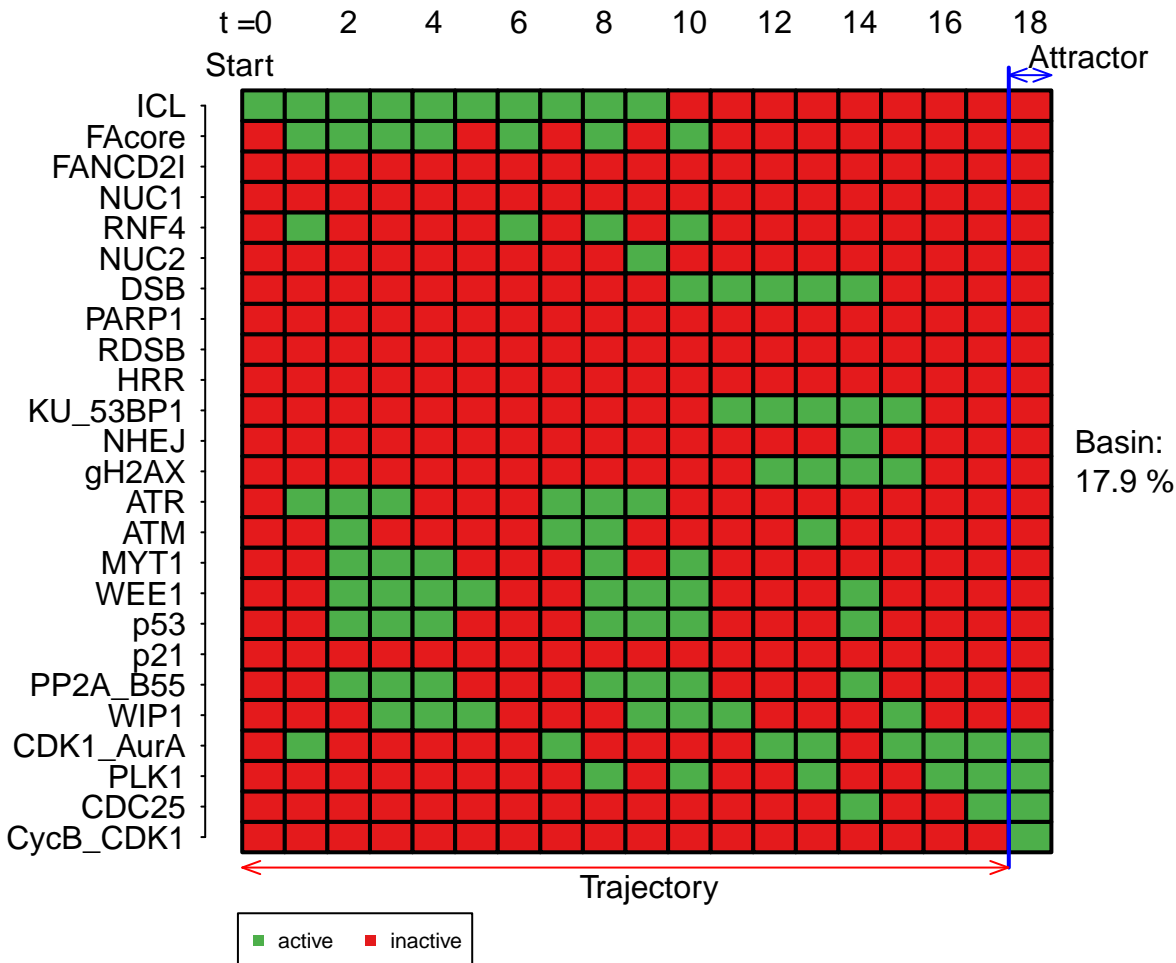

# PP2A\_B55\_0\_per\_ICL

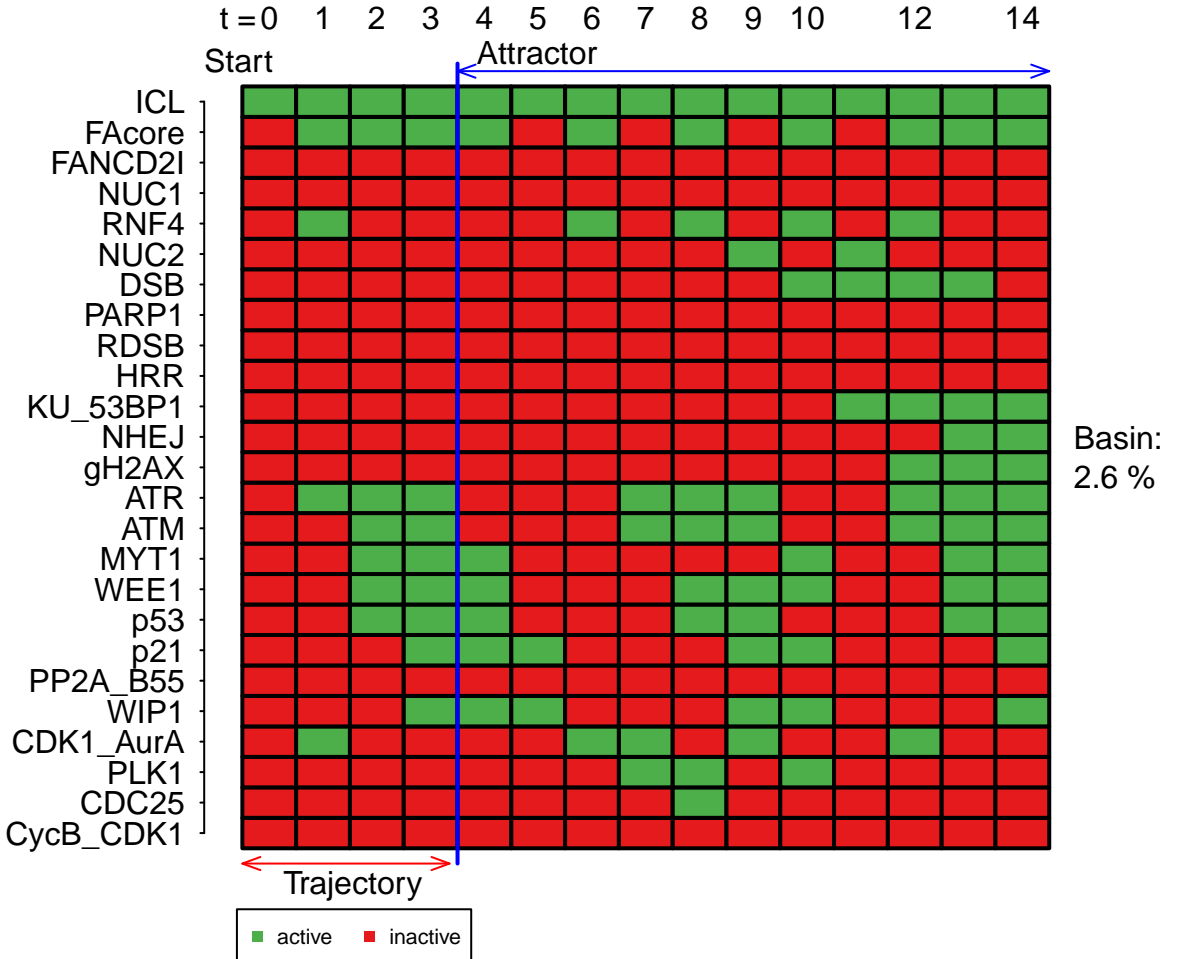



# WIP1\_0\_per\_ICL

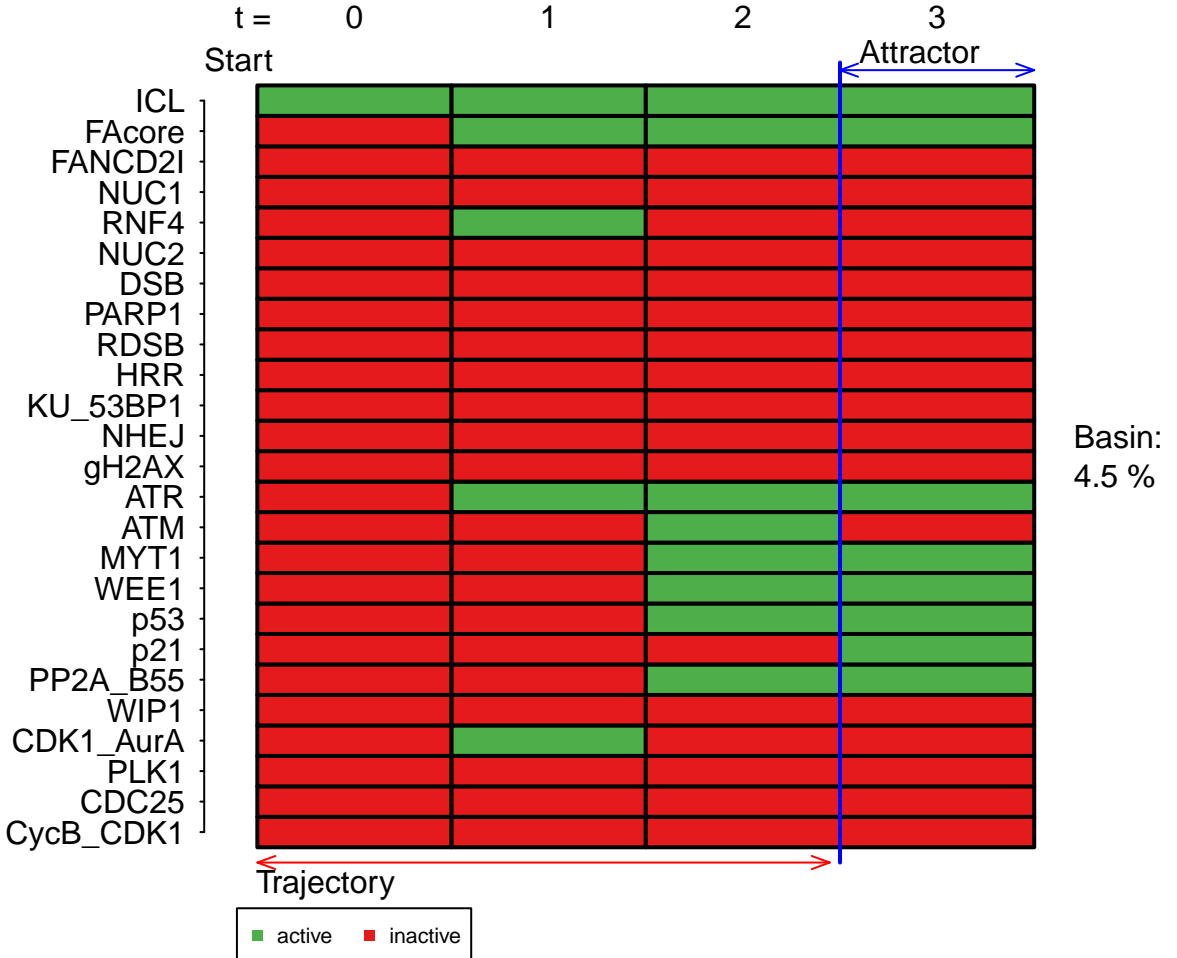

# WIP1\_0\_pul\_ICL

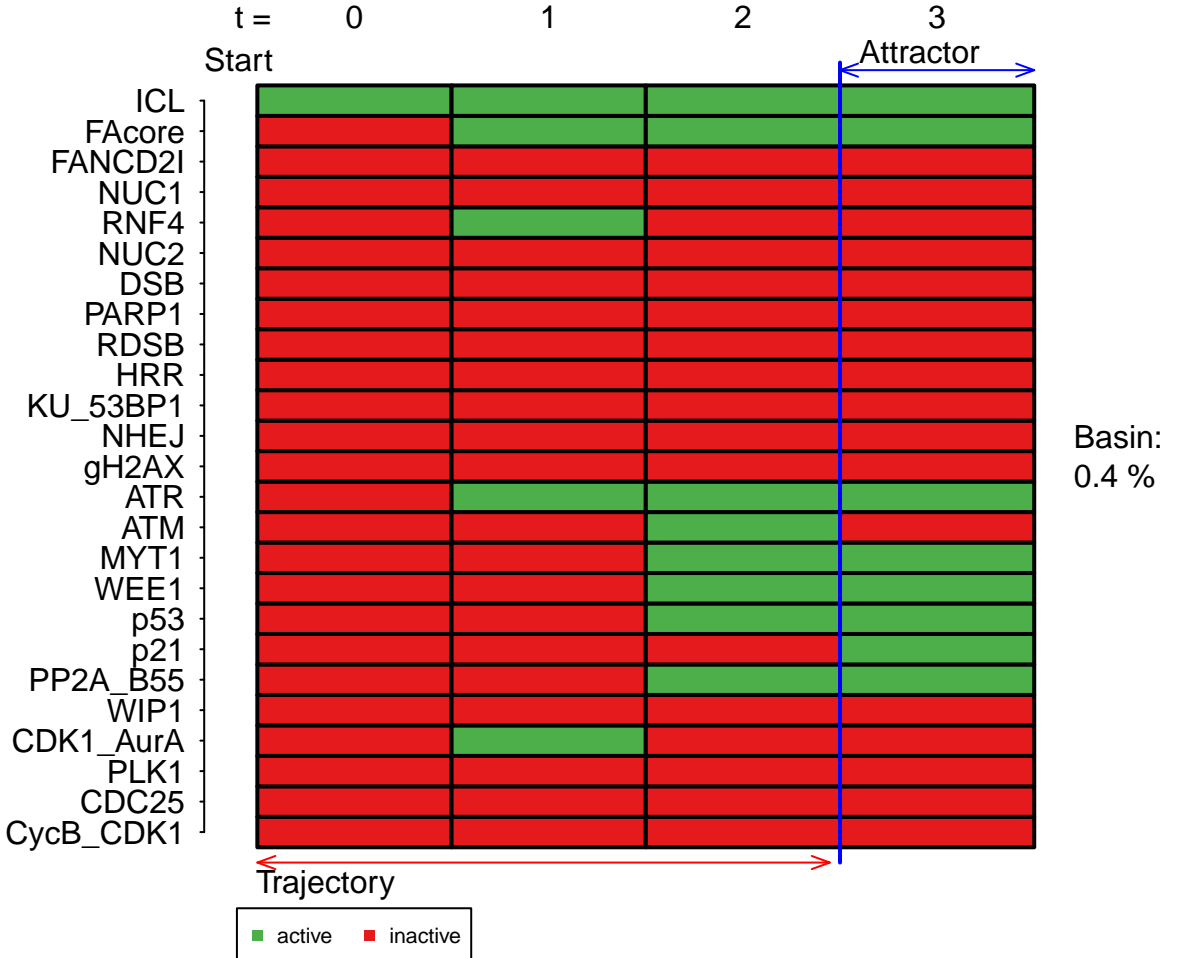





# PLK1\_0\_per\_ICL

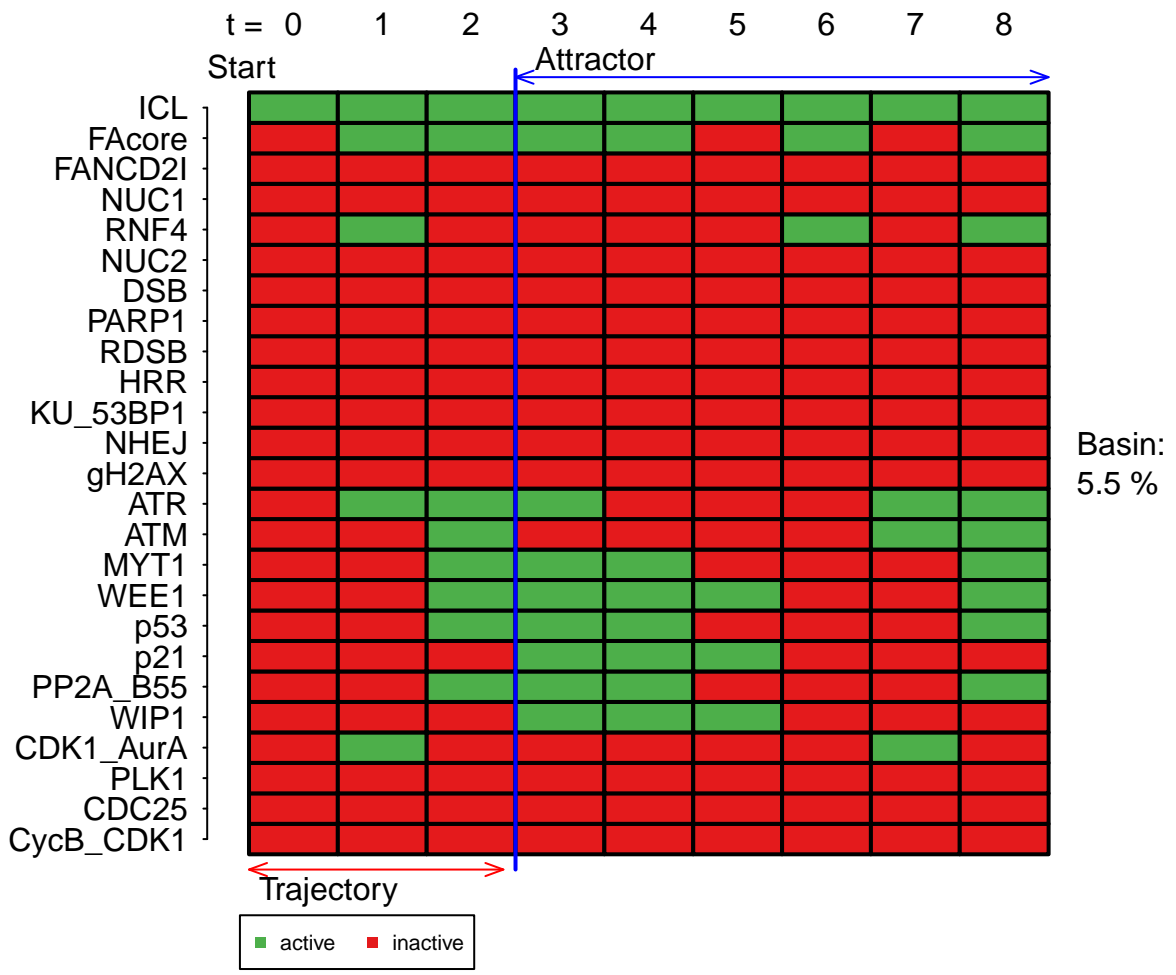





# CDC25\_0\_per\_ICL

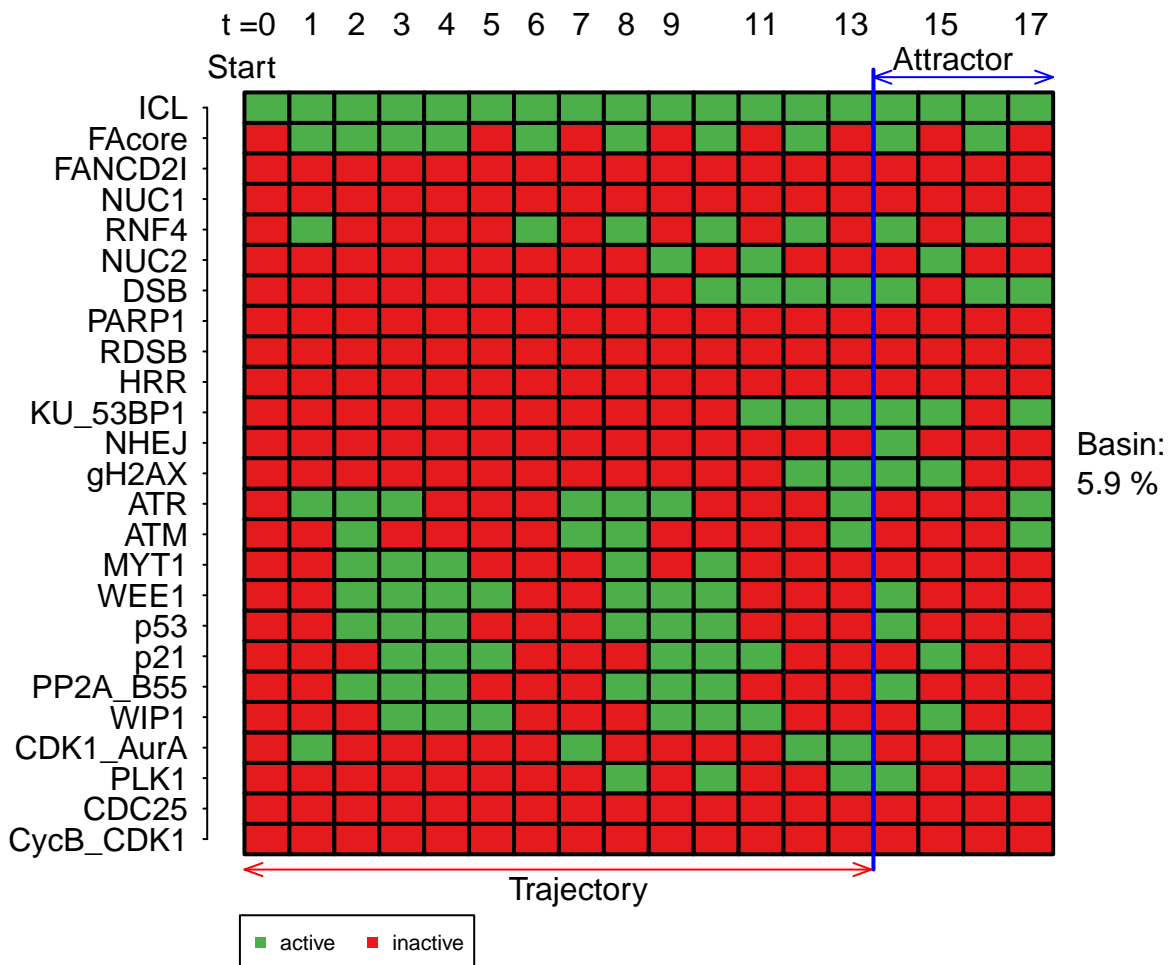

# CDC25\_0\_pul\_ICL

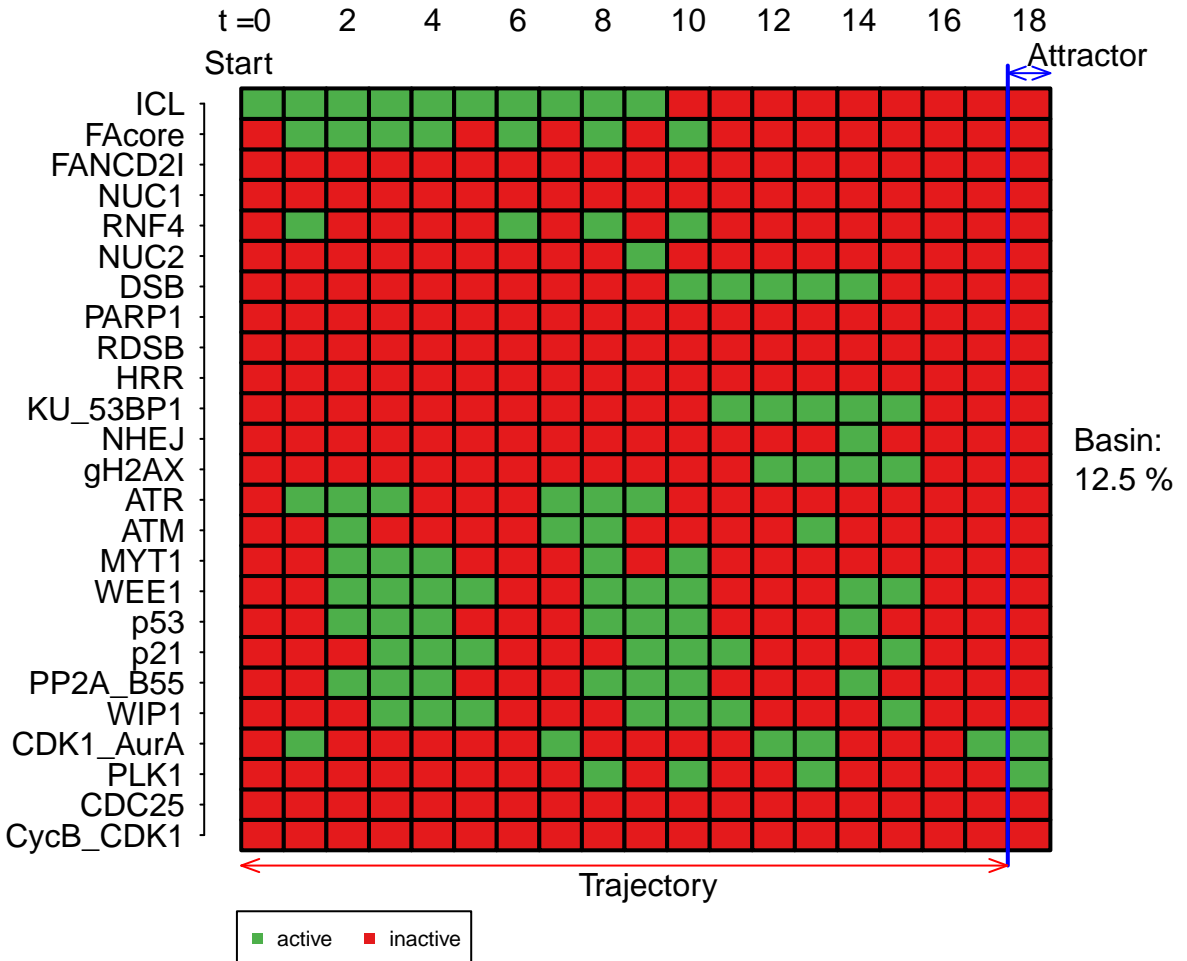

# CycB\_CDK1\_0\_per\_ICL

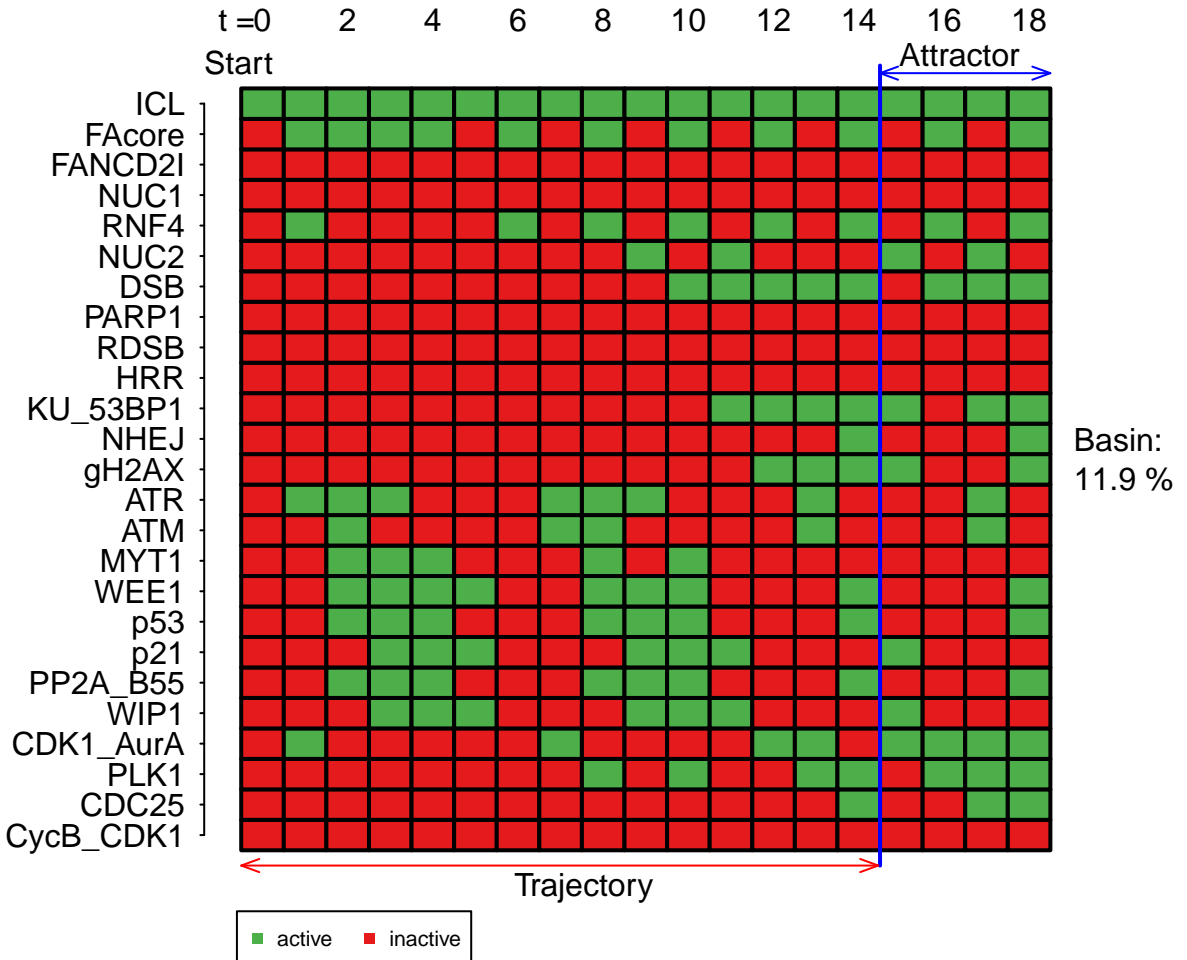

# CycB\_CDK1\_0\_pul\_ICL

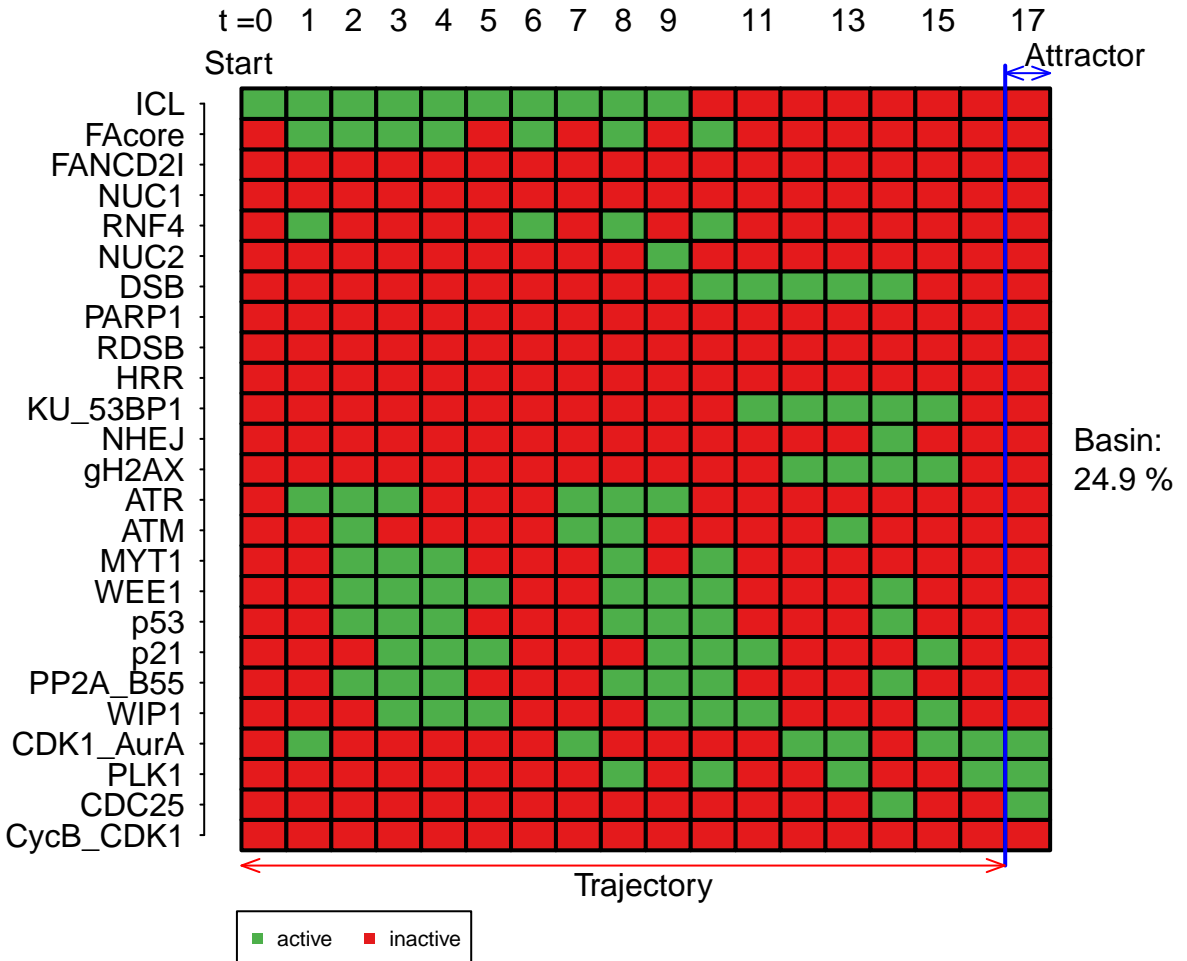

Supplement: Data_Sheet_4.pdf [file Data_Sheet_4.pdf]
